# Supplementary material for: Hemofiltration induces generation of leukocyte-derived CD31+/CD41− microvesicles in sepsis
Source: Springer Nature journal article supplement (doi:10.1186/s13613-017-0312-3), 2017-09-04

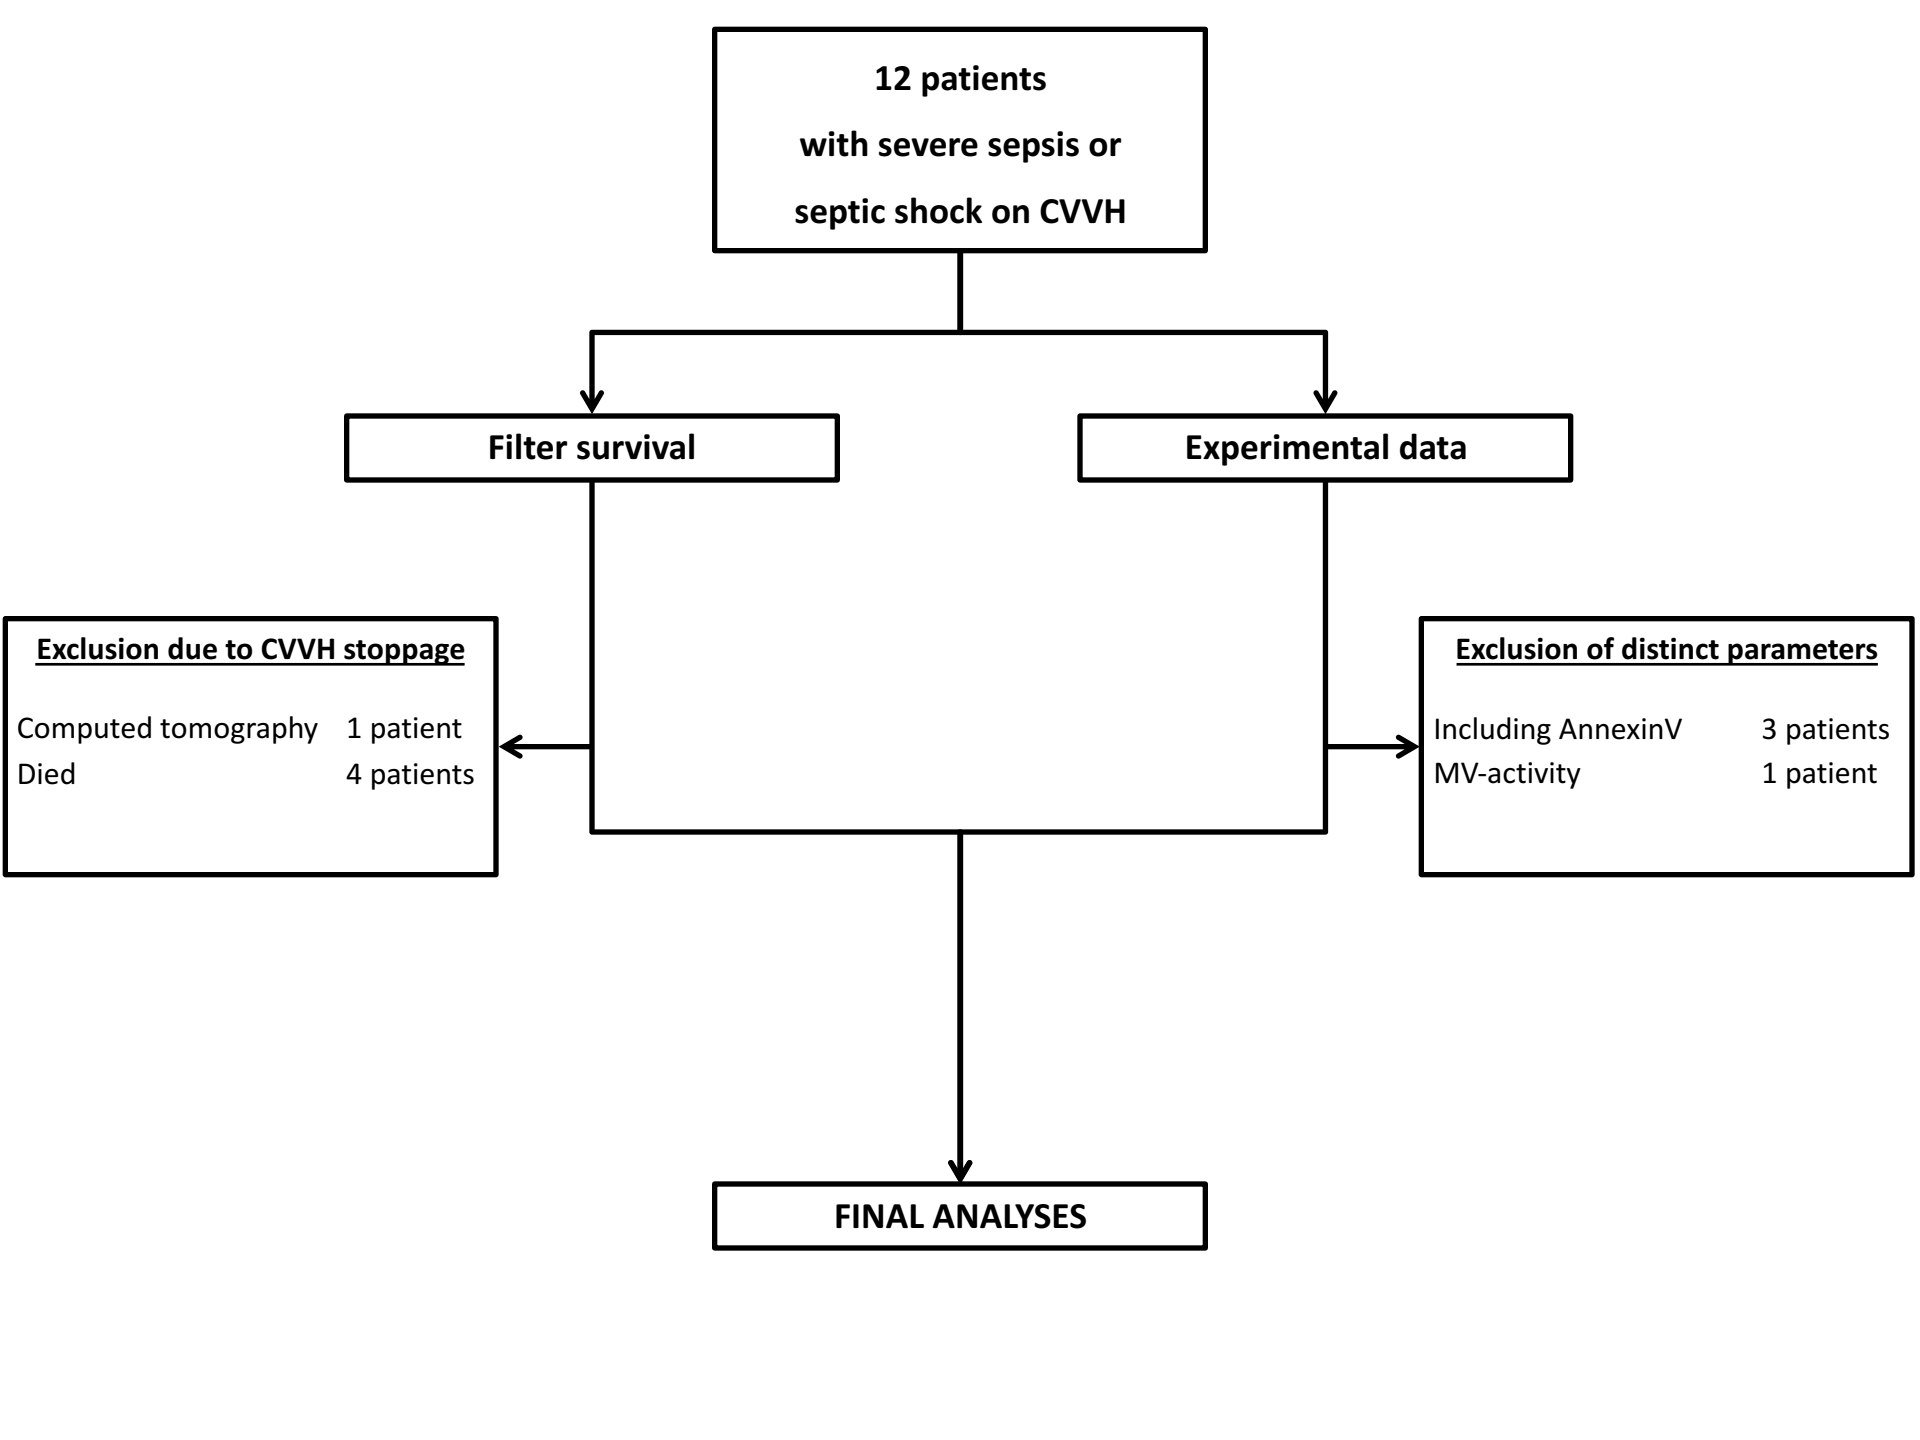

Supplement: MOESM1 [file 14976552]
